# Supplementary material for: Room temperature synthesized solid solution AuFe nanoparticles and their transformation into Au/Fe Janus nanocrystals
Source: Royal Society of Chemistry journal article supplement (doi:10.1039/d1nr00383f), 2021-01-01
Supplement: d1nr00383f1.pdf [file d1nr00383f1.pdf]

## Electronic Supplementary Information (ESI)

### Room temperature synthesized solid solution AuFe nanoparticles and their transformation to Au/Fe Janus nanocrystals

Maria V. Efremova, Marina Spasova, Markus Heidelmann, Ivan S. Grebennikov, Zi-An Li, Anastasiia S. Garanina, Iana O. Tcareva, Alexander S. Savchenko, Michael Farle, Natalia L. Klyachko, Alexander G. Majouga, and Ulf Wiedwald

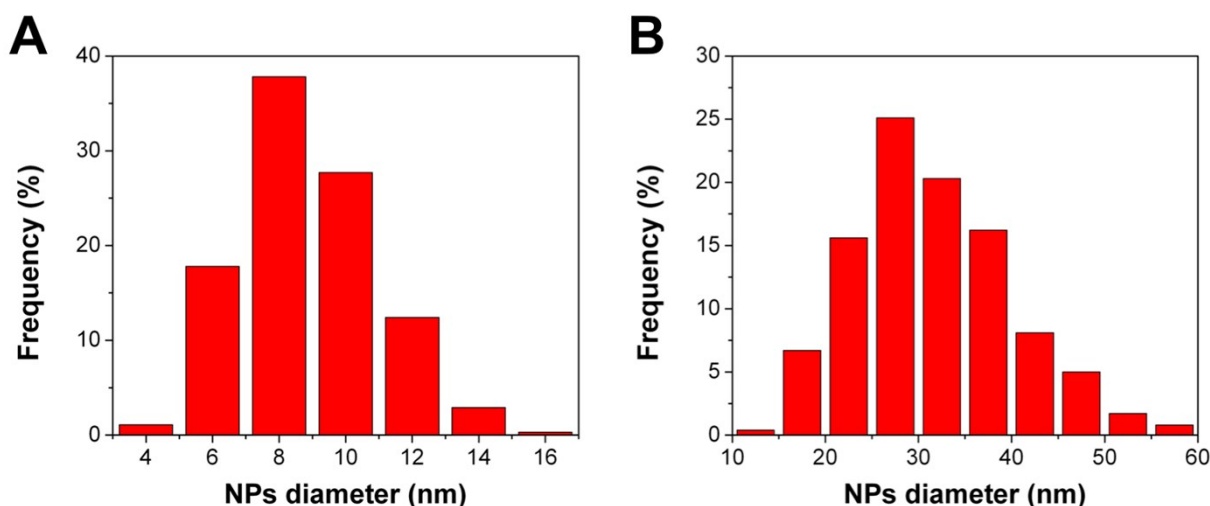

**Figure S1.** Size distribution of Fe<sub>3</sub>O<sub>4</sub> NPs (A) and AuFe NPs (B).

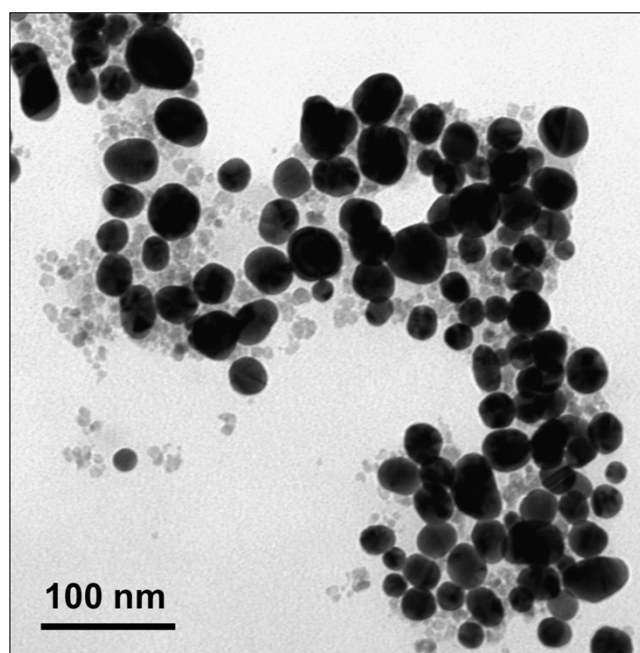

**Figure S2.** Bright-field TEM image of AuFe NPs on a carbon-coated Cu grid before the purification.

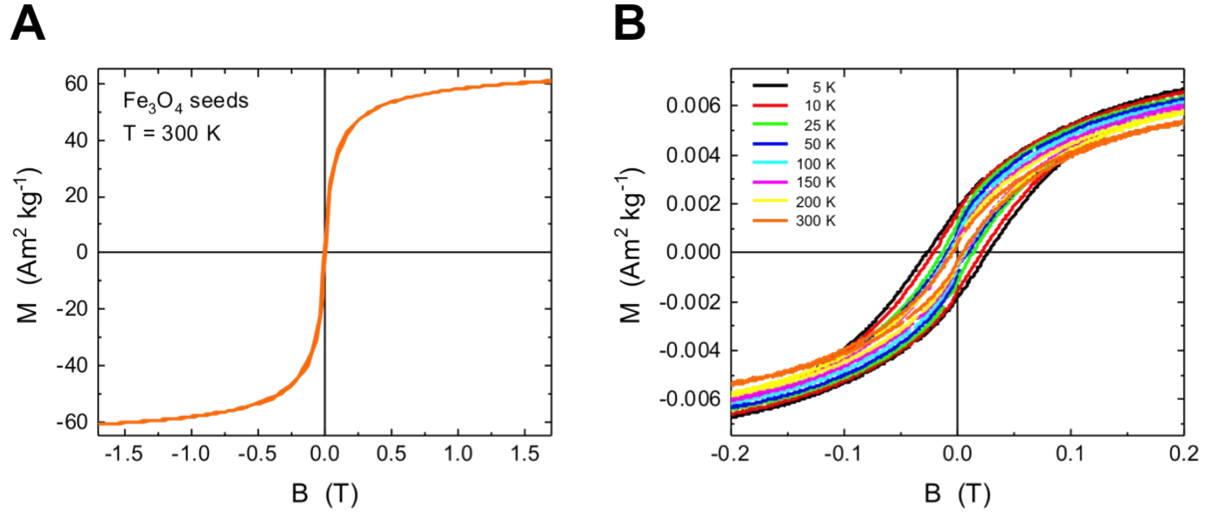

**Figure S3.** Magnetic characterization of  $\text{Fe}_3\text{O}_4$  seeds and AuFe NPs. (A) Hysteresis loop for  $\text{Fe}_3\text{O}_4$  seeds recorded at 300 K. (B) Hysteresis loops for AuFe NPs recorded at various temperatures between 5 K and 300 K, magnification around zero-field from the Figure 5A in the main text.

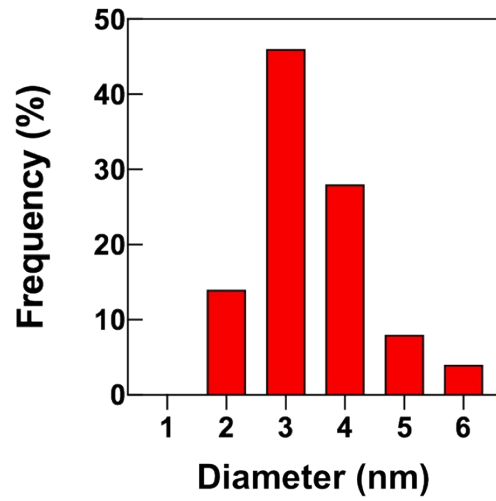

**Figure S4.** Size distribution of inclusions (regions of a different contrast) in the TEM images of the AuFe NPs.

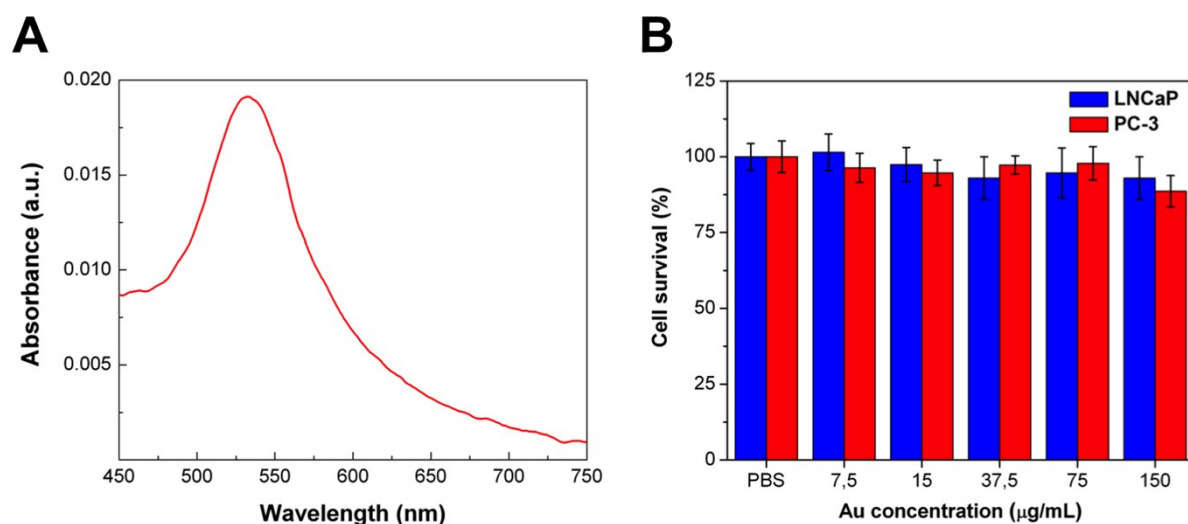

**Figure S5.** Properties of AuFe NPs for bio-applications. (A) UV-VIS spectra showing a plasmon resonance peak at 533 nm. (B) Cell viability study (MTS assay) of LNCaP and PC-3 cells after 48 h incubation with NPs in the concentration range 7.5 – 150 µg/mL Au.

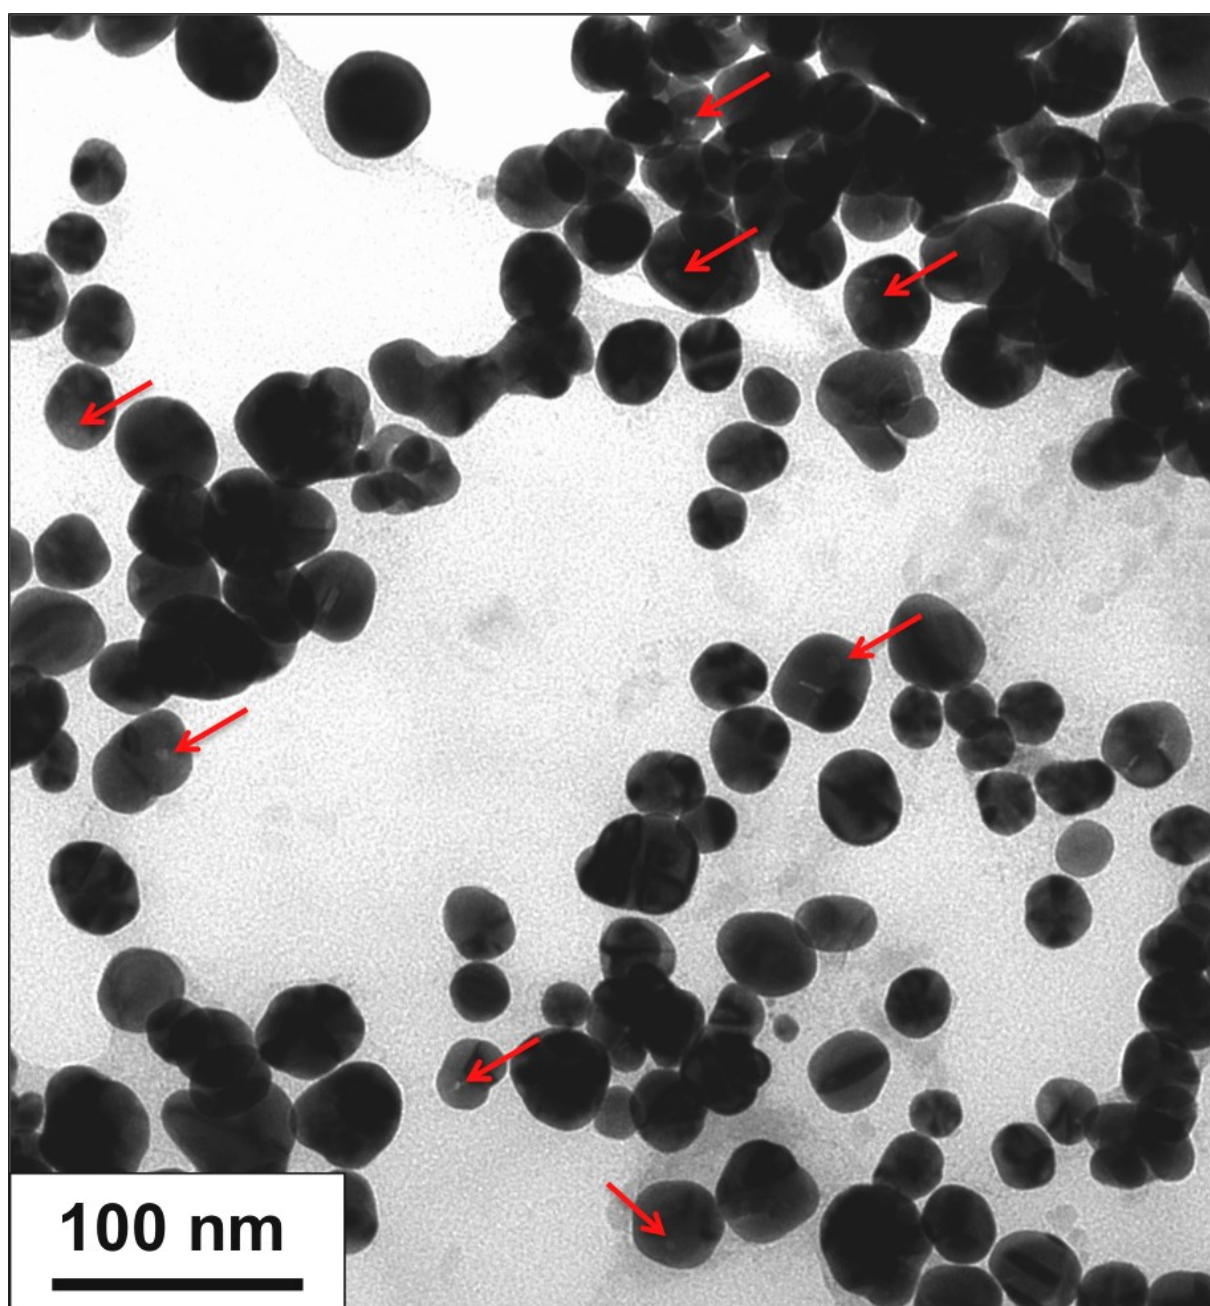

**Figure S6.** TEM image of AuFe NPs after the purification step. The presence of Fe inclusions is indicated by red arrows where obvious.

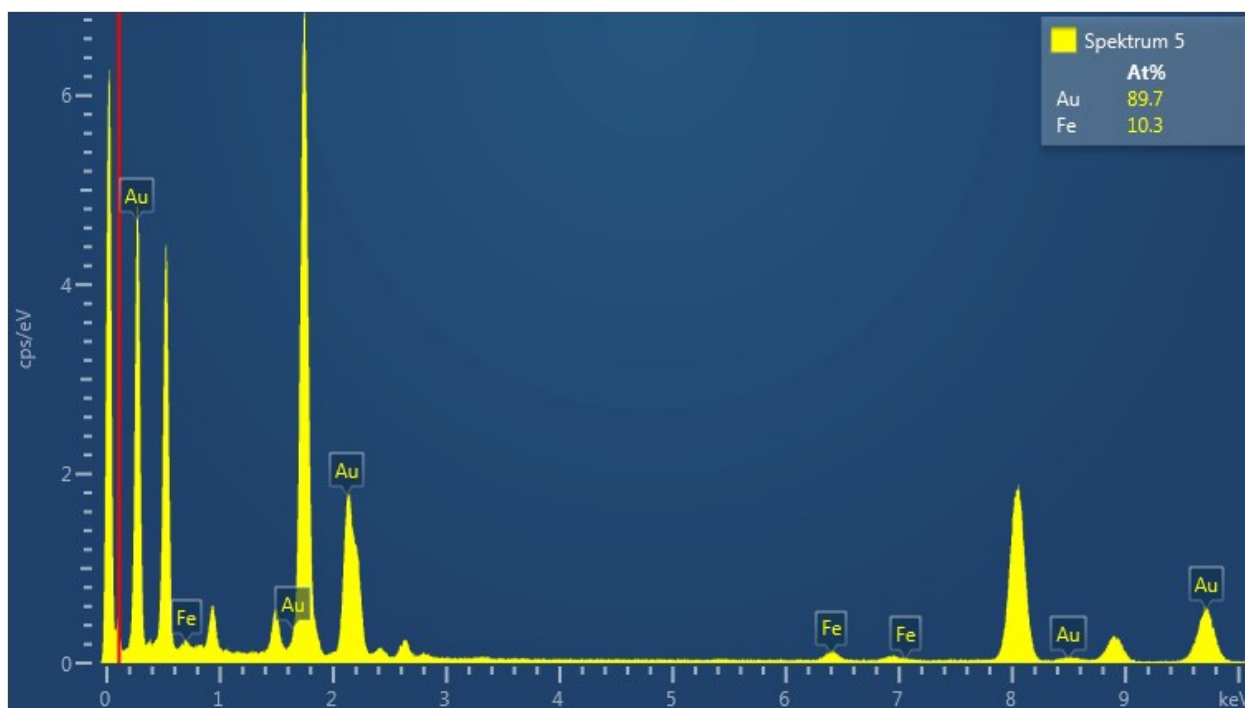

**Figure S7.** Overview EDX spectrum of AuFe NPs.

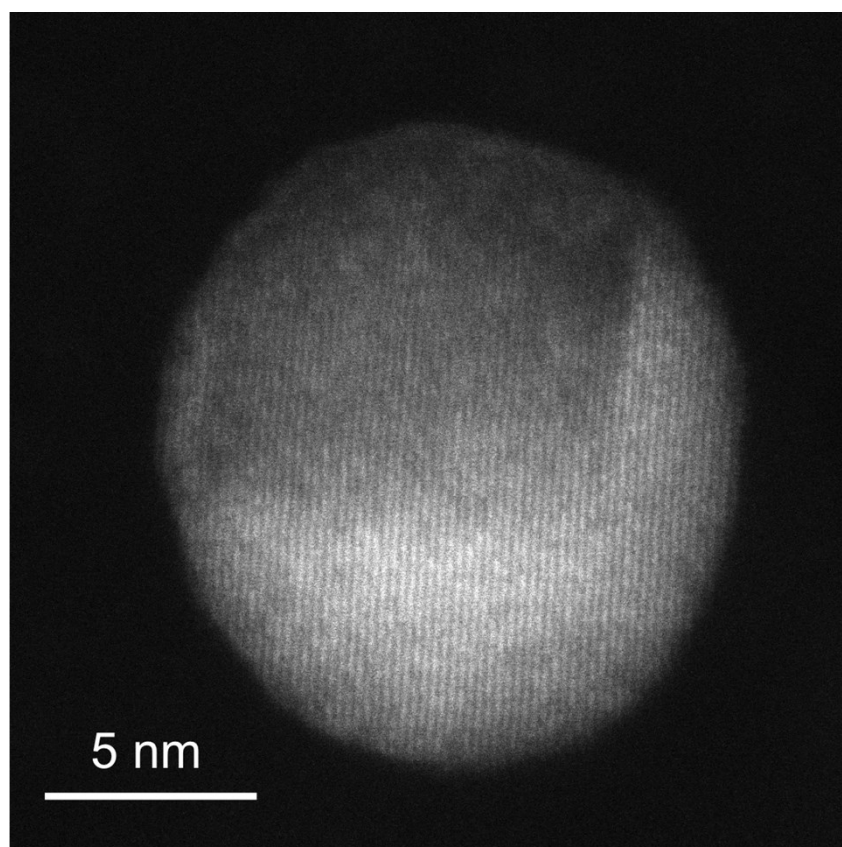

**Figure S8.** HAADF-STEM image of an Au/Fe NP on a SiN chip formed after the annealing of AuFe NP at 700°C. The image is taken at 25°C after 1 year in air demonstrating the resistance to atmospheric oxygen.
